# Supplementary material for: Salinity tolerance and growth response of redroot pigweed (Amaranthus retroflexus L.): a comprehensive evaluation
Source: PeerJ journal article supplement (doi:10.7717/peerj.19717), 2025-09-18
Supplement: GA_DATA.zip [file GA DATA.xlsx]

## Sheet: Plant height
	20/06/2023	30/06/2023	2023-11-07		Mean	20/06/2023	30/06/2023	2023-11-07								Sample Number	Total dry weight	Sample Number	STI (%)	Total dry weight of control		Sample Number	Mean of STI		Salinity degree	Mean of STI			Sample Number	Shoot length	Salinity shoot toxicity %	Shoot length of control	Mean		Salinity degree	Mean			Sample Number	Shoot length	Shoot length of control	Shoot length stress Index %	Mean		Salinity degree	Mean			Sample Number
Sample Number	Shoot Length	Shoot Length	Shoot Length		Sample Number	Shoot Length	Shoot Length	Shoot Length		Salinity degree	First measurement	Second measurement	Third measurement			1.1.1	52.45	1.1.1	100.827	52.02		1.1	97.6355		Slight	97.6355	10.2973		1.1.1	84	7.22145	95.3333	9.669		Slight	9.669	15.9244		1.1.1	84	95.3333	88.1119	85.6643		Slight	85.6643	40.4082		1.1.1
1.0.1	78.5	91	93		1.0	80.8333	93.3333	95.3333		Non	80.8333	93.3333	95.3333			1.1.2	44.9	1.1.2	86.313			1.2	62.6041		Moderate	62.6041			1.1.2	75	16.662		22.9557		Moderate	22.9557			1.1.2	75		78.6713	72.3776		Moderate	72.3776			1.1.2
1.0.2	86	94	96		1.1	81.6667	91.3333	92.3333		Slight	81.6667	91.3333	92.3333			1.1.3	55.02	1.1.3	105.767			1.3	28.0661		High	28.0661	89.7027		1.1.3	86	5.12354		38.5152		High	38.5152	84.0756		1.1.3	86		90.2098	56.8182		High	56.8182	59.5918		1.1.3
1.0.3	78	95	97		1.2	69	79.3333	82		Moderate	69	79.3333	82			1.2.1	29.84	1.2.1	57.3626			1.4	10.0923		Extreme1	10.0923			1.2.1	69.5	22.4312		60.7179		Extreme1	50.7529			1.2.1	69.5		72.9021	34.6154		Extreme1	44.5804			1.2.1
1.1.1	84	89	91		1.3	54.1667	61	62.6667		High	54.1667	61	62.6667			1.2.2	34.69	1.2.2	66.6859			1.5	10.0538		Extreme2	10.0538			1.2.2	70	21.9068		50.7529		Extreme2	60.7179			1.2.2	70		73.4266	44.5804		Extreme2	34.6154			1.2.2
1.1.2	75	94	94		1.4	42.5	50	50.46		Extreme1	42.5	50	50.46			1.2.3	33.17	1.2.3	63.7639										1.2.3	67.5	24.5291								1.2.3	67.5		70.8042							1.2.3
1.1.3	86	91	92		1.5	33	41	43		Extreme2	33	41	43	1.45736		1.3.1	15.41	1.3.1	29.6232										1.3.1	55	37.641								1.3.1	55		57.6923							1.3.1
1.2.1	69.5	82	83													1.3.2	16.48	1.3.2	31.6801										1.3.2	56.5	36.0676								1.3.2	56.5		59.2657							1.3.2
1.2.2	70	87	91.5										45.1049			1.3.3	11.91	1.3.3	22.895										1.3.3	51	41.8368								1.3.3	51		53.4965							1.3.3
1.2.3	67.5	69	71.5													1.4.3	5.25	1.4.3	10.0923										1.4.3	33	60.7179								1.4.3	33		34.6154							1.4.3
1.3.1	55	65	67										54.8951			1.5.3	5.23	1.5.3	10.0538										1.5.3	42.5	50.7529								1.5.3	42.5		44.5804							1.5.3
1.3.2	56.5	63	65
1.3.3	51	55	56
1.4.1
1.4.2
1.4.3	33	41	43
1.5.1
1.5.2
1.5.3	42.5	50	50.46
[truncated: 7 more columns]

## Sheet: CCI
	2023-06-20	2023-06-30	2023-07-11				Mean	2023-06-20	2023-06-30	2023-07-11			Salinity degree	First measurement	Second measurement	Third measurement
Sample Number	CCI	CCI	CCI				Sample Number	CCI	CCI	CCI			Non	29.0667	26.7333	18.9333		58.4155
1.0.1	27.6	25.4	18.3				1.0	29.0667	26.7333	18.9333			Slight	29.6333	29.6333	19.6667		41.5845
1.0.2	28.5	24.7	17.8				1.1	29.6333	29.6333	19.6667			Moderate	25.6	24.3667	16.2667
1.0.3	31.1	30.1	20.7				1.2	25.6	24.3667	16.2667			High	23.1	18.3667	14.3667	74.4589
1.1.1	27.6	27.8	18.6				1.3	23.1	18.3667	14.3667			Extreme1	17.2	15.3	12.6
1.1.2	29.8	29.6	22.2				1.4	17.2	15.3	12.6			Extreme2	16.05	13	11.06	25.5411
1.1.3	31.5	31.5	18.2				1.5	16.05	13	11.06
1.2.1	23.9	23.1	17.1
1.2.2	25.7	24.5	16.3
1.2.3	27.2	25.5	15.4
1.3.1	22.4	18.5	16.3
1.3.2	24.2	21.5	14.4
1.3.3	22.7	15.1	12.4
1.4.1	19.7
1.4.2	14.7
1.4.3		19.3	12.6
1.5.1		13
1.5.2	12.9
1.5.3	19.2

## Sheet: Stem diameter
Sample Number	Stem diameter, mm		Mean				Salinity degree	Stem diameter, mm
1.0.1	11.3		Sample Number	Stem diameter, mm			Non	11.2667	45.2663
1.0.2	11		1.0	11.2667			Slight	11.1
1.0.3	11.5		1.1	11.1			Moderate	9.26667	54.7337
1.1.1	11		1.2	9.26667			High	6.76667
1.1.2	11.1		1.3	6.76667			Extreme1	5.6
1.1.3	11.2		1.4	5.6			Extreme2	5.1
1.2.1	8.5		1.5	5.1
1.2.2	10.3
1.2.3	9
1.3.1	7.2
1.3.2	6.4
1.3.3	6.7
1.4.1
1.4.2
1.4.3	5.1
1.5.1	5.6
1.5.2
1.5.3

## Sheet: Scan
Sample number	Leaf number	Leaf weight	Leaf surface, cm2			LS=LFW/LA		Mean
1.0.1	1	0.85	27.29					Sample number	Leaf weight, g	Leaf surface, cm2	LS
	2	0.63	21.09					1.0	0.726667	24.4822	0.0296814
	3	0.57	18.11					1.1	0.727778	24.4144	0.0298093
1.0.2	1	0.81	29.32					1.2	0.67	22.2467	0.0301169
	2	0.7	24.75					1.3	0.484444	18.0933	0.0267747
	3	0.62	21.54					1.4	0.363333	14.5567	0.0249599
1.0.3	1	0.91	28.81					1.5	0.286667	12.1033	0.0236849
	2	0.78	26.55
	3	0.67	22.88
1.1.1	1	0.78	28.39					Salinity degree	LS
	2	0.8	25.31					Non	0.0296814	79.7972
	3	0.74	24.6					Slight	0.0298093	20.2028
1.1.2	1	0.63	20.43					Moderate	0.0301169
	2	0.59	20.05					High	0.0267747
	3	0.61	20.71					Extreme1	0.0249599
1.1.3	1	0.94	30.12					Extreme2	0.0236849
	2	0.78	26.94
	3	0.68	23.18
1.2.1	1	0.64	21.17
	2	0.58	20.07
	3	0.65	22.57
1.2.2	1	0.84	27.66
	2	0.69	23.24
	3	0.62	19.7
1.2.3	1	0.73	23.9
	2	0.71	23.18
	3	0.57	18.73
1.3.1	1	0.54	19.94
	2	0.46	17.78
	3	0.47	18.53
1.3.2	1	0.53	19.69
	2	0.51	19.57
	3	0.48	17.44
1.3.3	1	0.52	18.92
	2	0.42	15.18
	3	0.43	15.79
1.4.3	1	0.43	16.6
	2	0.33	14.11
	3	0.33	12.96
1.5.3	1	0.29	11.75
	2	0.27	12.3
	3	0.3	12.26

## Sheet: Plant weight
Sample Number	Fresh weight	Dry weight		paper weight		Sample Number	Fresh weight	Dry weight		Mean Root							Sample Number	Fresh weight	Dry weight				Mean Shoot										Sample Number	Fresh weight	Dry weight		Mean Leaf						Salinity degree	Fresh weight (root)	Dry weight (root)			Salinity degree	Fresh weight (leaf)
1.0.1root	12.74	3.19		10.08		1.0.1root	12.74	3.19		Sample Number	Fresh weight	Dry weight	Dry/Fresh	Fresh/Dry			1.0.1stem	168.4	37.53				Sample Number	Fresh weight	Dry weight	Dry/Fresh	Fresh/Dry						1.0.1leaf	40.23	7.54		Sample Number	Fresh weight	Dry weight	Dry/Fresh	Fresh/Dry		Non	13.3667	3.54			Non	30.2567
1.0.2r	14.17	3.94		10.08		1.0.2r	14.17	3.94		1.0r	13.3667	3.54	0.264838	3.77589			1.0.2s	160.77	41.5				1.0s	201.327	48.48	0.240803	4.15278						1.0.2l	39.3	7.45		1.0l	30.2567	7.99333	0.264184	3.78524		Slight	13.67	2.34667			Slight	50.0767
1.0.3r	13.19	3.49		10.08		1.0.3r	13.19	3.49		1.1r	13.67	2.34667	0.171665	5.82528			1.0.3s	184.04	42.43				1.1s	219.14	48.4433	0.221061	4.52364						1.0.3l	11.24	8.99		1.1l	50.0767	9.13667	0.182454	5.48085		Moderate	9.15333	2.06			Moderate	32.57
1.1.1r	12.99	2.68		10.08		1.1.1r	12.99	2.68		1.2r	9.15333	2.06	0.225055	4.44337			1.1.1s	186.88	39.78				1.2s	139.813	30.5067	0.218196	4.58304						1.1.1l	60.97	9.99		1.2l	32.57	4.74	0.145533	6.87131		High	4.93333	1.03			High	16.1933
1.1.2r	15.25	0.51		10.08		1.1.2r	15.25	0.51		1.3r	4.93333	1.03	0.208784	4.78964			1.1.2s	177.48	35.4				1.3s	62.8533	13.57	0.215899	4.63179						1.1.2l	47.82	8.99		1.3l	16.1933	2.04667	0.126389	7.91205		Extreme1	1.63	0.41			Extreme1	3.8
1.1.3r	12.77	3.85		10.08		1.1.3r	12.77	3.85		1.4r	1.63	0.41	0.251534	3.97561			1.1.3s	142.83	42.74				1.4s	17.22	4.84	0.281069	3.55785						1.1.3l	41.44	8.43		1.4l	3.8	1.02	0.268421	3.72549		Extreme2	1.78	0.45			Extreme2	6.48
1.2.1r	8.36	1.84		10.08		1.2.1r	8.36	1.84		1.5r	1.78	0.45	0.252809	3.95556			1.2.1s	102.55	25.16				1.5s	17.15	4.78	0.278717	3.58787						1.2.1l	28.01	2.84		1.5l	6.48	1.74	0.268519	3.72414
1.2.2r	10.92	2.5		10.08		1.2.2r	10.92	2.5									1.2.2s	114.49	26.27														1.2.2l	36.52	5.92
1.2.3r	8.18	1.84		10.08		1.2.3r	8.18	1.84									1.2.3s	104.69	25.87														1.2.3l	33.18	5.46
1.3.1r	5.25	1.05		10.08		1.3.1r	5.25	1.05		RWC%= [(FWr – DWr)/FWr] × 100							1.3.1s	54.33	11.77				SWC% = [(FWs – DWs)/FWs] × 100						root/shoot ratio (R/S)				1.3.1l	21.74	2.59		LWC% = [(FWL – DWL)/FWL] × 100						Salinity degree	FWr/FWs	DWr/DWs	RWC%	SWC%	LWC%
1.3.2r	5.67	1.17		10.08		1.3.2r	5.67	1.17		Sample Number	RWC%						1.3.2s	48.58	12.92				Sample Number	SWC%					Sample Number	R/S-Fresh	R/S-Dry		1.3.2l	14.5	2.39		Sample Number	LWC%					Non	0.0781357	0.0874362	73.5162	76.3333	73.5816
1.3.3r	3.88	0.87		10.08		1.3.3r	3.88	0.87		1.0r	73.5162						1.3.3s	37.07	9.88				1.0s	75.9197					1.0	0.0663929	0.0730198		1.3.3l	12.34	1.16		1.0l	73.5816					Slight	0.0808573	0.0597015	82.8335	76.7503	81.7546
1.4.3r	1.63	0.41		10.08		1.4.3r	1.63	0.41		1.1r	82.8335						1.4.3s	13.42	3.82				1.1s	77.8939					1.1	0.0623802	0.0484415		1.4.3l	3.8	1.02		1.1l	81.7546					Moderate	0.0853511	0.0799483	77.4945	75.9736	85.4467
1.5.3r	1.78	0.45		10.08		1.5.3r	1.78	0.45		1.2r	77.4945						1.5.3s	10.67	3.04				1.2s	78.1804					1.2	0.0654682	0.0675262		1.5.1l	6.48	1.74		1.2l	85.4467					High	0.105729	0.0893839	79.1216	75.3036	87.3611
1.0.1stem	168.4	37.53		10.08						1.3r	79.1216							Fresh weight of stem	Fresh weight of leaf	Fresh weight of shoot	Mean		1.3s	78.4101					1.3	0.0784896	0.0759027						1.3l	87.3611					Extreme1	0.121461	0.10733	74.8466	71.535	73.1579
1.0.2s	160.77	41.5		10.08						1.4r	74.8466						1.0.1stem	168.4	40.23	208.63	201.327		1.4s	71.8931					1.4	0.0946574	0.0847107						1.4l	73.1579					Extreme2	0.166823	0.148026	74.7191	71.5089	73.1481
1.0.3s	184.04	42.43		10.08						1.5r	74.7191						1.0.2s	160.77	39.3	200.07	219.14		1.5s	72.1283					1.5	0.10379	0.0941423						1.5l	73.1481
1.1.1s	186.88	39.78		10.08													1.0.3s	184.04	11.24	195.28	139.813
1.1.2s	177.48	35.4		10.08													1.1.1s	186.88	60.97	247.85	62.8533
1.1.3s	142.83	42.74		10.08													1.1.2s	177.48	47.82	225.3	17.22		Mean Root
1.2.1s	102.55	25.16		10.08													1.1.3s	142.83	41.44	184.27	17.15		Sample Number	Fresh weight	Dry weight	Dry/Fresh	Fresh/Dry
1.2.2s	114.49	26.27		10.08													1.2.1s	102.55	28.01	130.56			1.0r	13.3667	3.54	0.264838	3.77589
1.2.3s	104.69	25.87		10.08													1.2.2s	114.49	36.52	151.01			1.1r	13.67	2.34667	0.171665	5.82528
1.3.1s	54.33	11.77		10.08													1.2.3s	104.69	33.18	137.87			1.2r	9.15333	2.06	0.225055	4.44337
1.3.2s	48.58	12.92		10.08													1.3.1s	54.33	21.74	76.07			1.3r	4.93333	1.03	0.208784	4.78964
1.3.3s	37.07	9.88		10.08													1.3.2s	48.58	14.5	63.08			1.4r	1.63	0.41	0.251534	3.97561
1.4.3s	13.42	3.82		10.08													1.3.3s	37.07	12.34	49.41			1.5r	1.78	0.45	0.252809	3.95556
1.5.3s	10.67	3.04		10.08													1.4.3s	13.42	3.8	17.22
1.0.1leaf	40.23	7.54		10.08													1.5.3s	10.67	6.48	17.15
1.0.2l	39.3	7.45		10.08
1.0.3l	11.24	8.99		10.08
1.1.1l	60.97	9.99		10.08														Dry weight of stem	Dry weight of leaf	Fresh weight of shoot	Mean
1.1.2l	47.82	8.99		10.08													1.0.1stem	37.53	7.54	45.07	48.48
1.1.3l	41.44	8.43		10.08													1.0.2s	41.5	7.45	48.95	48.4433
1.2.1l	28.01	2.84		10.08													1.0.3s	42.43	8.99	51.42	30.5067
1.2.2l	36.52	5.92		10.08													1.1.1s	39.78	9.99	49.77	13.57
1.2.3l	33.18	5.46		10.08													1.1.2s	35.4	8.99	44.39	4.84
1.3.1l	21.74	2.59		10.08													1.1.3s	42.74	8.43	51.17	4.78
1.3.2l	14.5	2.39		10.08													1.2.1s	25.16	2.84	28
1.3.3l	12.34	1.16		10.08													1.2.2s	26.27	5.92	32.19
1.4.3l	3.8	1.02		10.08													1.2.3s	25.87	5.46	31.33
1.5.1l	6.48	1.74		10.08													1.3.1s	11.77	2.59	14.36
																	1.3.2s	12.92	2.39	15.31
																	1.3.3s	9.88	1.16	11.04
																	1.4.3s	3.82	1.02	4.84
																	1.5.3s	3.04	1.74	4.78
[truncated: 24 more columns]

## Sheet: Ions analysis
									Ion content in dry matter, mg/g							Ion content in leaf dry matter, mg/g							The content of some ions in the dry matter of the root, leaf and shoot of plants, mg/g
Sample Number	K+	Na+	Ca2+	Cl-	HNO3	m			Sample Number	K+	Na+	Ca2+	Cl-			Sample Number	K+	Na+	Ca2+	Cl-			Salinity degree	K+			Na+			Ca2+			Cl-				K/Na ratio					Phytodesalinization - the mass of ions removed by one plant
1.0.1leaf	200	1.4	35.2	8.15	60	0.6			1.0.1leaf	20	0.14	3.52	0.815			1.0l	16.2	0.156667	3.20667	0.939				root	stem	leaf	root	stem	leaf	root	stem	leaf	root	stem	leaf		root	stem	leaf
1.0.2l	134	1.7	35.2	10.35	60	0.6			1.0.2l	13.4	0.17	3.52	1.035			1.1l	22.7667	0.19	3.12667	1.16967			Non	14.0333	30.2333	16.2	6.74667	0.22	0.156667	0.803333	0.94	3.20667	0.246333	1.098	0.939		2.08004	137.424	103.404			Salinity degree	Dry weight (root)	Na+	Cl-		Salinity degree	Dry weight (stem)	Na+
1.0.3l	152	1.6	25.8	9.67	60	0.6			1.0.3l	15.2	0.16	2.58	0.967			1.2l	14	0.37	3.96	4.83333			Slight	15	36.5333	22.7667	9.24333	0.466667	0.19	0.94	1.41	3.12667	0.297333	1.41667	1.16967		1.62279	78.2857	119.825			Non	3.54	23.8832	0.87202		Non	40.4867	8.90707
1.1.1l	197	1.7	30.5	11.86	60	0.6			1.1.1l	19.7	0.17	3.05	1.186			1.3l	13.7667	1.15667	4.1	15.5667			Moderate	8.53667	36.2	14	20.9667	2.08	0.37	1.09667	1.56667	3.96	0.644333	2.10333	4.83333		0.407154	17.4038	37.8378			Slight	2.34667	21.691	0.697742		Slight	39.3067	18.3431
1.1.2l	242	2	30.5	11.19	60	0.6			1.1.2l	24.2	0.2	3.05	1.119			1.4l	12.6	4.06	4.79	22.5			High	5.43333	32.7333	13.7667	28.1667	9.79333	1.15667	1.41	1.88	4.1	1.122	9.81333	15.5667		0.192899	3.34241	11.902			Moderate	2.06	43.1913	1.32733		Moderate	25.7667	53.5947
1.1.3l	244	2	32.8	12.04	60	0.6			1.1.3l	24.4	0.2	3.28	1.204			1.5l	11.9	5.19	2.81	23.1			Exteme 1	5.03	32	12.6	33.8	19	4.06	1.88	1.88	4.79	1.97	15.1	22.5		0.148817	1.68421	3.10345			High	1.03	29.0117	1.15566		High	11.5233	112.852
1.2.1l	143	3.1	39.6	49.5	60	0.6			1.2.1l	14.3	0.31	3.96	4.95										Extreme 2	4.24	30.4	11.9	44.6	34.8	5.19	2.34	2.34	2.81	2.96	24.5	23.1		0.0950673	0.873563	2.29287			Exteme 1	0.41	13.858	0.8077		Exteme 1	3.82	72.58
1.2.2l	144	3.7	37.5	47.1	60	0.6			1.2.2l	14.4	0.37	3.75	4.71											3.30975	1.00551	1.36134	6.61067	158.182	33.1277	2.91286	2.48936	1.14116	12.0162	22.3133	24.6006							Extreme 2	0.45	20.07	1.332		Extreme 2	3.04	105.792
1.2.3l	133	4.3	41.7	48.4	60	0.6			1.2.3l	13.3	0.43	4.17	4.84
1.3.1l	149	11.4	37.5	152	60	0.6			1.3.1l	14.9	1.14	3.75	15.2										Mean K+			Mean Na+
1.3.2l	138	13.1	41.7	155	60	0.6			1.3.2l	13.8	1.31	4.17	15.5										root	stem	leaf	root	stem	leaf
1.3.3l	126	10.2	43.8	160	60	0.6			1.3.3l	12.6	1.02	4.38	16										8.71222	33.0167	15.2056	23.9206	11.06	1.85389
1.4.3l	226	40.6	47.9	225	60	0.6			1.4.3l	22.6	4.06	4.79	22.5
1.5.1l	162	51.9	28.1	231	60	0.6			1.5.1l	16.2	5.19	2.81	23.1
1.0.1stem	289	2	9.4	10.82	60	0.6			1.0.1stem	28.9	0.2	0.94	1.082			Ion content in stem dry matter, mg/g
1.0.2s	302	1.8	9.4	11.67	60	0.6			1.0.2s	30.2	0.18	0.94	1.167			Sample Number	K+	Na+	Ca2+	Cl-
1.0.3s	316	2.8	9.4	10.45	60	0.6			1.0.3s	31.6	0.28	0.94	1.045			1.0s	30.2333	0.22	0.94	1.098
1.1.1s	377	4.7	14.1	14.5	60	0.6			1.1.1s	37.7	0.47	1.41	1.45			1.1s	36.5333	0.466667	1.41	1.41667
1.1.2s	394	5.1	14.1	13.8	60	0.6			1.1.2s	39.4	0.51	1.41	1.38			1.2s	36.2	2.08	1.56667	2.10333
1.1.3s	325	4.2	14.1	14.2	60	0.6			1.1.3s	32.5	0.42	1.41	1.42			1.3s	32.7333	9.79333	1.88	9.81333
1.2.1s	378	18.2	14.1	20.5	60	0.6			1.2.1s	37.8	1.82	1.41	2.05			1.4s	32	19	1.88	15.1
1.2.2s	372	21.4	14.1	21.7	60	0.6			1.2.2s	37.2	2.14	1.41	2.17			1.5s	30.4	34.8	2.34	24.5
1.2.3s	336	22.8	18.8	20.9	60	0.6			1.2.3s	33.6	2.28	1.88	2.09
1.3.1s	338	89.8	18.8	95.1	60	0.6			1.3.1s	33.8	8.98	1.88	9.51
1.3.2s	299	75	18.8	80.6	60	0.6			1.3.2s	29.9	7.5	1.88	8.06
1.3.3s	345	129	18.8	118.7	60	0.6			1.3.3s	34.5	12.9	1.88	11.87
1.4.3s	320	190	18.8	151	60	0.6			1.4.3s	32	19	1.88	15.1
1.5.3s	362	348	23.4	245	60	0.6			1.5.3s	36.2	34.8	2.34	24.5
1.0.1root	146	54.8	5.3	2.35	60	0.6			1.0.1root	14.6	5.48	0.53	0.235			Ion content in root dry matter, mg/g
1.0.2r	135	63.5	9.4	2.86	60	0.6			1.0.2r	13.5	6.35	0.94	0.286			Sample Number	K+	Na+	Ca2+	Cl-
1.0.3r	140	84.1	9.4	2.18	60	0.6			1.0.3r	14	8.41	0.94	0.218			1.0r	14.0333	6.74667	0.803333	0.246333
1.1.1r	146	100	9.4	2.96	60	0.6			1.1.1r	14.6	10	0.94	0.296			1.1r	15	9.24333	0.94	0.297333
1.1.2r	169	86.4	9.4	3.07	60	0.6			1.1.2r	16.9	8.64	0.94	0.307			1.2r	8.53667	20.9667	1.09667	0.644333
1.1.3r	135	90.9	9.4	2.89	60	0.6			1.1.3r	13.5	9.09	0.94	0.289			1.3r	5.43333	28.1667	1.41	1.122
1.2.1r	79.9	198	9.4	5.91	60	0.6			1.2.1r	7.99	19.8	0.94	0.591			1.4r	5.03	33.8	1.88	1.97
1.2.2r	95.7	206	9.4	6.65	60	0.6			1.2.2r	9.57	20.6	0.94	0.665			1.5r	4.24	44.6	2.34	2.96
1.2.3r	80.5	225	14.1	6.77	60	0.6			1.2.3r	8.05	22.5	1.41	0.677
1.3.1r	56.1	263	14.1	9.11	60	0.6			1.3.1r	5.61	26.3	1.41	0.911
1.3.2r	55	288	14.1	10.85	60	0.6			1.3.2r	5.5	28.8	1.41	1.085
1.3.3r	51.9	294	14.1	13.7	60	0.6			1.3.3r	5.19	29.4	1.41	1.37
1.4.3r	61.3	338	18.8	19.7	40	0.4			1.4.3r	6.13	33.8	1.88	1.97
1.5.3r	42.4	446	23.4	29.6	40	0.4			1.5.3r	4.24	44.6	2.34	2.96
[truncated: 21 more columns]

## Sheet: Membrane demage (MDR)
Sample Number	24 hours	Autoclave		Plant weight	Water Valume		Sample Number	Mean EC-24 hours	EC-autoclave	H2O	m		MDR=(EC1/EC2) × 100				Salinity degree	REL
1.0.1	90.2	482.4		0.5	50		1.0	87.1733	449.167	50	0.5		Sample Number	MDR			Non	19.4078	458.831
1.0.2	70.52	402.7		0.5	50		1.1	151.5	489.733	50	0.5		1.0	19.4078			Slight	30.9352	4.58831
1.0.3	100.8	462.4		0.5	50		1.2	265.3	517.067	50	0.5		1.1	30.9352			Moderate	51.3087
1.1.1	157.5	522.1		0.5	50		1.3	422	561.967	50	0.5		1.2	51.3087			High	75.0934
1.1.2	171.4	470.3		0.5	50		1.4	578.9	662.6	50	0.5		1.3	75.0934			Extreme1	87.3679
1.1.3	125.6	476.8		0.5	50		1.5						1.4	87.3679			Extreme2	89.049
1.2.1	235.1	535.2		0.5	50								1․5	89.049
1.2.2	303.3	498.6		0.5	50
1.2.3	257.5	517.4		0.5	50
1.3.1	321.8	508.4		0.5	50
1.3.2	454.7	586		0.5	50
1.3.3	489.5	591.5		0.5	50
1.4.3	578.9	662.6		0.5	50

## Sheet: Photosynthesis
2023-06-20										2023-06-30									2023-07-11							Pn-umol/m^2/s of plants grown in clay loam soil							Plants grown in clay loam soil
Sample number	CO2in-ppm	Pn-umol/m^2/s	E-mmol/m^2/s	C-mmol/m^2/s		2023-06-20				Sample number	CO2in-ppm	Pn-umol/m^2/s	E-mmol/m^2/s	C-mmol/m^2/s					Sample number	CO2in-ppm	Pn-umol/m^2/s	E-mmol/m^2/s	C-mmol/m^2/s			Salinity degree	First measurement	Second measurement	Third measurement			Salinity degree	Pn-umol/m^2/s			E-mmol/m^2/s			Water use efficiency (WUE)
1.0	468	1.51	1.56	0		Sample number	Pn-umol/m^2/s	E-mmol/m^2/s		1.0	442.5	4.54	1.33	0					1.0	441.4	7.06	0.85	0			Non	6.22636	7.89667	8.56667				First measurement	Second measurement	Third measurement	First measurement	Second measurement	Third measurement	First measurement	Second measurement	Third measurement
	469.2	9.69	1.27	0		1.0	6.22636	1			444.6	8.38	1.37	0						457.6	22.42	1.22	0			Slight	7.066	5.08182	8.35091			Non	6.22636	7.89667	8.56667	1	1.08455	1.75083	6.22636	7.28108	4.89291
	463.1	6.59	1.15	0		1.1	7.066	0.909			447	11.67	1.45	0						446.5	10.17	1.24	0			Moderate	6.939	4.436	6.1925			Slight	7.066	5.08182	8.35091	0.909	0.8725	0.950769	7.77338	5.82443	8.78332
	459	6.06	0.83	0		1.2	6.939	1.036			451.8	1.53	1.38	0						443.1	8.15	1.02	0			High	5.91256	4.08667	5.14077			Moderate	6.939	4.436	6.1925	1.036	0.871	0.825714	6.69788	5.093	7.49957
	461.9	7.52	0.84	0		1.3	5.91256	0.972			467.3	15.18	1.12	0						440.3	3.27	1.19	0			Extreme1	5.18333	3.82	4.77			High	5.91256	4.08667	5.14077	0.972	0.86	0.6158	6.08288	4.75194	8.34812
	461.9	6.16	0.76	0		1.4	5.18333	0.627143			451.6		1.04	0						469.7	10.1	3.04	0			Extreme2	4.562	3.62667	4.12088			Extreme1	5.18333	3.82	4.77	0.627143	0.646667	0.5575	8.265	5.90722	8.55605
	462.2	6.45	0.98	0		1.5	4.562	0.582			461.8	7.36	0.99	0						464.9	12.58	1.6	0									Extreme2	4.562	3.62667	4.12088	0.582	0.613333	0.30587	7.83849	5.91305	13.4726		2.7535
	461	9.26	0.86	0							447.1	1.23	0.84	0						453.8	7.04	0.94	0												48.1036			17.47			275.35
	453.8	5.35	0.99	0							455.9	15.24	0.77	0						438.4	2.36	2.98	0												51.8964			82.53
	452.6	3.51	0.79	0							444.3		0.81	0						438.3	2.51	2.86	0			E-mmol/m^2/s of plants grown in clay loam soil
	452	6.39	0.97	0		2023-06-30					444.5	5.94	0.83	0						442.2	2.13	2.22	0			Salinity degree	First measurement	Second measurement	Third measurement
1․0 C	461	1.91	0.73	0		Sample number	Pn-umol/m^2/s	E-mmol/m^2/s		1.0 C	449.3	4.23	1.04	0						448.9	15.01	1.85	0			Non	1	1.08455	1.75083
	461.7	4.27	1.2	0		1.0	7.89667	1.08455			451.3	8.51	1.05	0					1.0 C	437.3	5.52	1.39	0			Slight	0.909	0.8725	0.950769
	464.7	8.28	0.9	0		1.1	5.08182	0.8725			446.6	5.55	1.09	0						440	11.65	1.32	0			Moderate	1.036	0.871	0.825714
	466.2	9.05	0.83	0		1.2	4.436	0.871			459.1		0.89	0						436.7	9.58	0.45	0			High	0.972	0.86	0.6158
	459.4	5.27	0.93	0		1.3	4.08667	0.86			472.1	31.73	0.77	0						435.4	8.3	1.58	0			Extreme1	0.627143	0.646667	0.5575
	459.8	6.97	0.96	0		1.4	3.82	0.646667			474.3	15.55	0.91	0						448.5	2.91	0.51	0			Extreme2	0.582	0.613333	0.30587
	463.1	6.37	1.11	0		1.5	3.62667	0.613333			446.6	2.98	0.82	0						463.7	23.17	0.57	0
	445.3	4.28	1.02	0							440.5	2.81	0.8	0						452	5.65	1.11	0
	446.1	4.06	1.04	0						1.1	441.3	10.32	0.87	0						443.6	1.7	1.21	0
	448.1	6.29	1.17	0		2023-07-11					433.5	5.75	0.85	0						444.3	1.6	2.19	0			Water use efficiency (WUE) of plants grown in clay loam soil
1.1	448.5	1.22	0.68	0		Sample number	Pn-umol/m^2/s	E-mmol/m^2/s			431.6	7.55	0.99	0						459.2	5.37	2.34	0			Salinity degree	First measurement	Second measurement	Third measurement
	450.3	7.21	0.87	0		1.0	8.56667	1.75083			436.6	3.36	0.99	0						444.1	3.01	2.34	0			Non	6.22636	7.28108	4.89291
	452	4.93	1.01	0		1.1	8.35091	0.950769			437.4	2.51	1.08	0						455.4	8.34	2.11	0			Slight	7.77338	5.82443	8.78332
	458.7	8.68	1.11	0		1.2	6.1925	0.825714			436.8	4.34	1.17	0					1.1	438.3		0.7	0			Moderate	6.69788	5.093	7.49957
	448.2	12.65	1.05	0		1.3	5.14077	0.6158			436.9	4.37	0.99	0						445.5	4.62	0.96	0			High	6.08288	4.75194	8.34812
	447.8	4.49	0.88	0		1.4	4.77	0.5575			441.2	1.46	0.56	0						458.5	13.64	1.03	0			Extreme1	8.265	5.90722	8.55605
	454.5	6.39	0.9	0		1.5	4.12088	0.30587			443.5		0.81	0						448.1	7.97	1.17	0			Extreme2	7.83849	5.91305	13.4726
	456.1	6.01	0.84	0							440.7	7.37	0.69	0						446.5	8.29	0.71	0
	460	10.49	1.08	0							438.6	3.48	0.77	0						452.2	9.44	1.42	0
	451.5	8.59	0.67	0							440.1	5.39	0.7	0						446.2	3.33	1.07	0
1.1 C	450.5	4.41	1.07	0						1.1 C	437.1	6.79	1.15	0						447.9	5.32	1.07	0
	453.3	8.16	1.17	0							436.4	5.15	1.2	0						446.5	2.52	0.63	0
	447.7	4.61	1.14	0							437.3	5.89	1.24	0						442	3.46	0.82	0
	448.8	5.54	1.06	0							436.2	3.64	1.12	0						441.2	4.38	0.64	0
	449.4	6.27	0.92	0							436.5	5.63	1.25	0						441.6	3	1.35	0
	452	7.66	1.01	0							436.2	3.8	1.07	0						441.4	8.34	0.79	0
	445	3.38	0.85	0							439.9	6.31	0.82	0					1.1 C	457.5	17.29	0.86	0
	444.9	6.55	0.98	0							439.3	3.96	1.02	0						445.8	8.96	1.08	0
	449.1	7.54	0.98	0							440.2	7.38	0.74	0						451.1	12.31	1.09	0
1.2	459.2	10.24	0.98	0						1.2	433.6	1.46	0.93	0						443.2	6.36	1.23	0
	457	6.95	1.01	0							437.4	9	0.97	0						451.5	14.41	0.99	0
	459.5	9.14	1.4	0							431.5	4.98	1.14	0						443		1.44	0
	444.4	2.93	0.7	0							435.5	0.96	1.01	0						451.1	4.48	1.34	0
	446.4	5.89	0.89	0							440.4	7.78	0.76	0						454.3	11.24	0.76	0
	451.9	5.21	0.79	0							435.8	4.63	0.89	0						435.2		1.04	0
	462.5	18.46	1.25	0							435.7	5.87	0.91	0						448.9	9.61	0.79	0
	447.9	1.29	1.1	0							436.9	1.35	0.63	0						442.8	8.41	0.77	0
	451.5	6.02	1.01	0							439.3	3.38	0.78	0						447.6	13.71	0.89	0
	451.1	3.26	1.23	0							441.5	4.95	0.69	0						441.8	9.88	0.53	0
1.2 C	450	3.89	1.45	0						1.2 C	432.8	7.04	1.17	0						439.3	6.49	1.16	0
	445.7	0.28	1.67	0							431.9	3.37	1.39	0					1.2	440.6	2.64	0.82	0
	446.2	4.52	1.7	0							430.2	7.38	1.43	0						443.7		0.92	0
	447.8	2.84	0.77	0							437	3.51	0.8	0						446.7	9.59	0.84	0
	451.4	3.68	0.9	0							439	6.76	0.81	0						453.5		1.04	0
	453.3	6.82	0.93	0							438	2.94	0.73	0						441.7	7.46	0.95	0
	450.5	5.41	1.04	0							432.3	1.07	0.86	0						453.9	2.68	0.79	0
	452.5	6.52	1.12	0							435.3	5.5	0.95	0						459.6		1.14	0
	450	2.71	1.11	0							434.7	5.13	1.08	0						459.5	8.81	0.85	0
1.3	448.1	5.13	0.76	0						1.3	428.8	4.23	1.04	0						458.9	10.69	0.61	0
	450	5.28	0.97	0							429.8	4.21	1.02	0						470.6	16.51	0.8	0
	449.1	6.76	0.89	0							431.6	6.57	1.26	0						451.4	4.61	0.59	0
	452.8	5.03	0.99	0							442.1	8.08	0.33	0						453.6	6	0.86	0
	462.4	11.55	1.05	0							437.7	4.87	0.64	0						453.9	9.78	0.7	0
	451.3		0.71	0							437.3	3.92	0.93	0						459.2	13.09	0.65	0
	447.6	8.57	1.21	0							436	2.9	0.69	0					1.2 C	439.1	5.19	1.07	0
	449.7	9.32	1.18	0							436.9	6.03	0.86	0						443.2	6.93	1.21	0
	449.1	6.25	1.16	0							436	4.97	0.97	0						445.1	6.41	0.96	0
	447.7	11.92	0.8	0						1.3 C	433	7.4	1.13	0						452.1	12.09	1.15	0
1.3 C	454.2	1.89	0.92	0							428.9	4.1	1.12	0						443.3	6.75	1.12	0
	453.3	3.13	0.88	0							433.4	11.44	1.15	0						453.4	5.66	0.92	0
	455	8.95	1.13	0							436.2	4.5	0.76	0						463.1	13.99	0.97	0
	448.1	6.67	0.87	0							436.5	4.53	0.91	0						454.3	4.97	0.93	0
	449.1	4.29	1.11	0							438.2	6.62	0.84	0						457.9	11.46	0.83	0
	450.7	5.47	1.22	0							437.4	5.16	0.7	0						451.7	0.08	0.64	0
	441.8	5.59	1.12	0							438.8	6.74	0.84	0						454.5	4.81	0.62	0
	443.5	7.11	1.19	0							436.6	4.97	0.89	0						454.5	8.2	0.96	0
	443.7	9.5	1.25	0							436.6	6.11	0.99	0						453.2	5.12	0.86	0
1.4	442.9	2.64	0.63	0						1.4	435.8	2.84	0.62	0						454.4	9.86	0.89	0
	447.2	5.85	0.73	0							436.7	4.22	0.65	0					1.3	448.2	4.28	0.51	0
	447.2	5.39	0.79	0							439.7	4.4	0.67	0						447.3	0.04	0.79	0
	442.9		0.23	0						1.4 C	437.7	3.95	0.54	0						449.4	4.7	0.81	0
	446	4.3	0.76	0							443.3	6.3	0.75	0						447.1	5.95	0.95	0
	447.4	5.82	0.61	0							441.2	3.35	0.73	0						442.3	0.93	1.17	0
	447	7.1	0.64	0						1.5	441.2	5.75	0.73	0						445	5.32	0.81	0
1.4 C	447	5.83	0.82	0							440.3	3.89	0.67	0						445.7	5.16	1.11	0
	448.3	9.73	0.95	0							444.2	7.24	0.62	0						445.1	5.34	1.11	0
	446	9.32	1.12	0						1.5 C	441	5.16	0.67	0						443	5.83	0.86	0
	446.9		0.76	0							441.8	3.51	0.74	0						443.8	0.81	1.47	0
	445.2	3.78	0.99	0							446.1	10.16	0.51	0						452.3	14.14	0.91	0
	448.5	7.83	0.62	0																441.2	1.97	1.33	0
	457.6	18.66	0.97	0																442.4	12.36	1.43	0
1.5	454.7	3.73	0.94	0															1.3 C	444	2.64	0.77	0
	456.6	7.41	0.96	0																475.9	33.51	0.89	0
	453.7	5.53	0.59	0																446.2	4.05	0.9	0
	444.5		0.35	0																443.9	5.77	0.69	0
	448.9	9.85	0.87	0																450.4	11.9	1.41	0
	445.9		0.87	0																445.5	3.82	1.3	0
	449.3		0.86	0																444.7	7.81	0.77	0
	447.9	6.29	0.96	0																454.3	14.18	2.05	0
1.5 C	445.4	0.94	0.69	0																440.9		1.97	0
	445.8	6.25	0.65	0																443.5	6.02	1.73	0
	449.6	8.74	0.85	0																441.8	6.83	1.19	0
	444.3	5.91	0.71	0															1.4	450.7	3.87	0.14	0
	447.3	5.27	1.07	0																453.1	7.24	0.59	0
	451.5	3.9	0.81	0																453.3	0.71	0.62	0
	453.5	5.17	0.89	0																458	7.26	0.88	0
	452.2	5.98	0.65	0															1.4 C	448.9	0.8	0.77	0
																				458.4	13.28	0.62	0
																				452.1	7.11	0.75	0
																				450.2	3.59	0.82	0

## Sheet: Coorelation
Salinity degree	Shoot Length, cm	Stem diameter, mm	Fresh weight (root)	Dry weight (root)	Fresh weight (shoot)	Dry weight (shoot)	Fresh weight (leaf)	Dry weight (leaf)	Root TWC	Shoot TWC	Leaf TWC	REL	LS	CCI	Pn	E	WUE	K+ root	K+ stem	K+ leaf	Na+ root	Na+ stem	Na+ leaf	Ca2+ root	Ca2+ stem	Ca2+ leaf	Cl- root	Cl- stem	Cl- leaf
Non	95.3333	11.2667	13.3667	3.54	171.07	40.4867	30.2567	7.99333	2.78524	3.22534	2.78524	19.4078	0.0296814	18.9333	8.56667	1.75083	4.89291	14.0333	30.2333	16.2	6.74667	0.22	0.156667	0.803333	0.94	3.20667	0.246333	1.098	0.939
Slight	92.3333	11.1	13.67	2.34667	169.063	39.3067	50.0767	9.13667	4.48085	3.30114	4.48085	30.9352	0.0298093	19.6667	8.35091	0.950769	8.78332	15	36.5333	22.7667	9.24333	0.466667	0.19	0.94	1.41	3.12667	0.297333	1.41667	1.16967
Moderate	82	9.26667	9.15333	2.06	107.243	25.7667	32.57	4.74	5.87131	3.1621	5.87131	51.3087	0.0301169	16.2667	6.1925	0.825714	7.49957	8.53667	36.2	14	20.9667	2.08	0.37	1.09667	1.56667	3.96	0.644333	2.10333	4.83333
High	62.6667	6.76667	4.93333	1.03	46.66	11.5233	16.1933	2.04667	6.91205	3.04918	6.91205	75.0934	0.0267747	14.3667	5.14077	0.6158	8.34812	5.43333	32.7333	13.7667	28.1667	9.79333	1.15667	1.41	1.88	4.1	1.122	9.81333	15.5667
Extreme1	50.46	5.6	1.63	0.41	13.42	3.82	3.8	1.02	2.72549	2.51309	2.72549	87.3679	0.0249599	12.6	4.77	0.5575	8.55605	5.03	32	12.6	33.8	19	4.06	1.88	1.88	4.79	1.97	15.1	22.5
Extreme2	43	5.1	1.78	0.45	10.67	3.04	6.48	1.74	2.72414	2.50987	2.72414	89.049	0.0236849	11.06	4.12088	0.30587	13.4726	4.24	30.4	11.9	44.6	34.8	5.19	2.34	2.34	2.81	2.96	24.5	23.1
